# Supplementary material
Source: MDPI journal article supplement (https://www.mdpi.com/2673-351X/6/1/1)
Supplement: s1 [file s1]

**Table S1.** Reference values for specific IgE in serum

| Age           | Upper limit of normal, U/ml |
|---------------|-----------------------------|
| 1-5 years     | 60                          |
| 6-9 years     | 155                         |
| 10 – 15 years | 199                         |
| > 16 years    | 100                         |

**Table S2.** EAST scale for reporting the results.

| EAST class | Concentration [kU/l] | Interpretation                                                                             |
|------------|----------------------|--------------------------------------------------------------------------------------------|
| 0          | < 0.35               | undetectable IgE                                                                           |
| 1          | 0.35 – 0.7           | very low IgE titer, often no clinical symptoms with sensitization present                  |
| 2          | 0.7 – 3.5            | low IgE titer, there is sensitization, often with clinical symptoms at higher class values |
| 3          | 3.5 – 17.5           | significant IgE titer, clinical symptoms are usually present                               |
| 4          | 17.5 – 50            | high IgE titer, symptoms are almost always present                                         |
| 5          | 50 – 100             | very high IgE titer                                                                        |
| 6          | > 100                | abnormally high IgE titer                                                                  |

**Table S3.** ImmunoCAP reading scale (kUA/l) \* The expected values for specific IgE are not age-dependent.

| Quantitative result (kUA/l)* | Allergen-specific antibody level | Semi-quantitative result (specific IgE class) |
|------------------------------|----------------------------------|-----------------------------------------------|
| <0.35                        | Missing / undetectable           | 0                                             |
| 0.35 – 0.7                   | Low                              | 1                                             |
| 0.7 - <3.5                   | Moderate                         | 2                                             |
| 3.5 - <17.5                  | High                             | 3                                             |
| 17.5 - <50                   | Very high                        | 4                                             |
| 50 - <100                    | Very high                        | 5                                             |
| 100 и >100                   | Very high                        | 6                                             |

**Table S4.** Comparison of mean total IgE (U/ml) titer values by sex (girls/boys)

| Sex   | N  | Mean          | SD     | SE    | 95% CI      |             | Min | Max   |
|-------|----|---------------|--------|-------|-------------|-------------|-----|-------|
|       |    |               |        |       | Lower limit | Upper limit |     |       |
| M     | 58 | <b>256.57</b> | 213.90 | 27.85 | 200.82      | 312.31      | 3.7 | 557.8 |
| F     | 28 | <b>274.63</b> | 212.27 | 40.85 | 190.66      | 358.60      | 5.8 | 555.5 |
| Total | 86 | 262.24        | 212.31 | 22.89 | 216.72      | 307.76      | 3.7 | 557.8 |

**Table S5.** Comparison of the mean values of total IgE between positive specific IgE against cats and house dust mites against children with a negative test.

| ELISA, Total IgE, U/ml                    | Median, IQR              | p      |
|-------------------------------------------|--------------------------|--------|
| sIgE cat < 3 EAST class                   | 146.350 (57.05-427.450)  | 0.009  |
| sIgE cat ≥ 3 EAST class                   | 519.400 (185.250-552.75) |        |
| sIgE <i>Derm. Pharinae</i> <1 EAST class  | 144.60 (54.42-363.32)    | 0.0001 |
| sIgE <i>Derm. Pharinae</i> ≥ 1 EAST class | 552.70 (506.90-554.55)   |        |
| sIgE <i>Derm. Pter.</i> <1 EAST class     | 137.20 (45.87-361.97)    | 0.0001 |
| sIgE <i>Derm. Pter.</i> ≥ 1 EAST class    | 551.80 (438.65-554.45)   |        |

**Table S6a.** ROC curve characteristics of EUROIMMUN aero vs ImmunoCAP Phadiatop

| EUROIMMUN ped. (aeroallergens) vs. ImmunoCAP Phadiatop |       |       |       |             |             |
|--------------------------------------------------------|-------|-------|-------|-------------|-------------|
|                                                        | AUC   | SE    | P     | 95% CI      |             |
|                                                        |       |       |       | Lower limit | Upper limit |
| gx/ grass mix                                          | 0.778 | 0.066 | 0.002 | 0.649       | 0.907       |
| d1/dermatoph. pter                                     | 0.643 | 0.080 | 0.118 | 0.486       | 0.800       |
| d2/dermatoph. fa                                       | 0.680 | 0.077 | 0.048 | 0.530       | 0.831       |
| e1/cat                                                 | 0.698 | 0.075 | 0.030 | 0.551       | 0.845       |
| e2/dog                                                 | 0.516 | 0.090 | 0.864 | 0.339       | 0.692       |
| m2/cladosporium                                        | 0.525 | 0.090 | 0.784 | 0.348       | 0.702       |
| m3/aspergillus                                         | 0.547 | 0.088 | 0.608 | 0.374       | 0.720       |
| m6/alternaria                                          | 0.555 | 0.088 | 0.545 | 0.384       | 0.727       |

**Table S6b.** ROC curve characteristics of EUROIMMUN aero vs ImmunoCAP Phadiatop

| Tested allergen  | Sensitivity | Specificity |
|------------------|-------------|-------------|
| gx/grass mix     | 59.5%       | 93.3%       |
| d2/dermatoph. fa | 40.6%       | 93.3%       |
| e1/cat           | 43.8%       | 93.3%       |

**Table S7.** Correlation analysis between ImmunoCAP Phadiatop and Euroimmun aero.

| Spearman's rho      |            | ImmunoCap Phadiatop | Cat e1      | Dog e2 | derm. p d1 | derm. f d2 | grass mix gx | Birch t3 | Mugwort w6 |
|---------------------|------------|---------------------|-------------|--------|------------|------------|--------------|----------|------------|
| ImmunoCap Phadiatop | Corr.coef. | 1.000               | 0.448<br>** | .045   | 0.483**    | 0.565**    | 0.452**      | 0.123    | 0.247      |
|                     | p          | .                   | 0.01        | 0.759  | 0.001      | 0.000      | 0.001        | 0.405    | 0.091      |
|                     | Number     | 48                  | 48          | 48     | 48         | 48         | 48           | 48       | 48         |

\*\* The correlation is significant at p<0.01; \* The correlation is significant at p - 0.05

**Table S8.** Correlation analysis between ImmunoCAP Phadiatop and Euroimmun food.

| Spearman's Rho     |             | ImmunoCap/fx5 UA/l | Soybean  | Peanut  | Cow's Milk | Egg White | Codfish |
|--------------------|-------------|--------------------|----------|---------|------------|-----------|---------|
| ImmunoCap fx5 UA/l | Corr. Coef. | 1.000              | 0.401 ** | 0.287 * | 0.201      | -0.127    | -0.148  |
|                    | p           | .                  | 0.005    | 0.048   | 0.170      | 0.388     | 0.316   |
|                    | Number      | 48                 | 48       | 48      | 48         | 48        | 48      |

\*\* The correlation is significant at p—0.01; \* The correlation is significant at p—0.05.

**Table S9.** ROC curve characteristics (assessment of the specificity and sensitivity of EUROIMMUN food to ImmunoCAP fx5)

| Tested allergen   | AUC   | SE    | p     | 95% Confidential Interval |             |
|-------------------|-------|-------|-------|---------------------------|-------------|
|                   |       |       |       | Lower limit               | Upper limit |
| f2/cow milk       | 0.592 | 0.096 | 0.318 | 0.404                     | 0.781       |
| f76/a-lactalbumin | 0.578 | 0.096 | 0.401 | 0.390                     | 0.765       |
| f77/b-lactalbumin | 0.500 | 0.093 | 1.000 | 0.318                     | 0.682       |
| f78/ casein       | 0.471 | 0.090 | 0.751 | 0.294                     | 0.648       |
| f3/ codfish       | 0.477 | 0.091 | 0.803 | 0.298                     | 0.655       |
| f4/ wheal         | 0.709 | 0.091 | 0.024 | 0.530                     | 0.888       |
| f14/ soy          | 0.628 | 0.096 | 0.166 | 0.440                     | 0.817       |
| f13/ peanut       | 0.570 | 0.095 | 0.447 | 0.385                     | 0.756       |

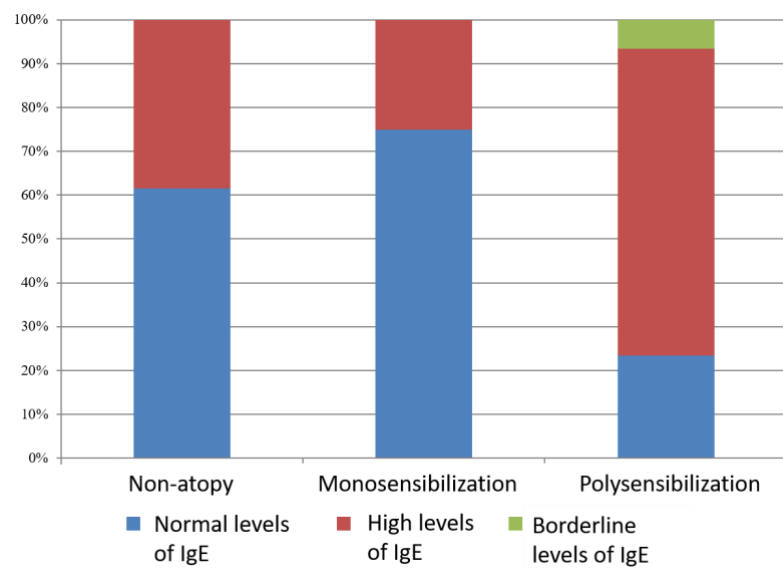

**Figure S1.** Comparison of total IgE titer in the group of non-atopic, mono- and polysensitised patients, Euroimmun pediatric,  $p = 0.003$ .

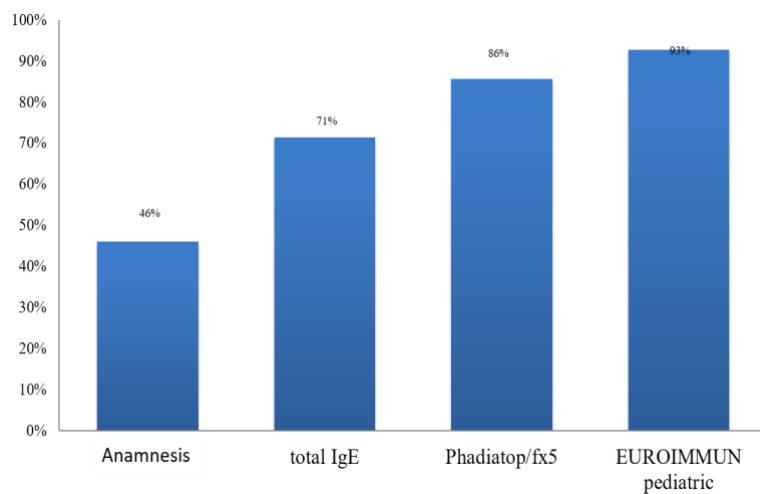

**Figure S2.** Classification of children with bronchial asthma and AR as atopic / non-atopic (N = 28).
